# Supplementary material for: Iron Oxide Nanoparticles Coated with a Phosphorothioate Oligonucleotide and a Cationic Peptide: Exploring Four Different Ways of Surface Functionalization
Source: MDPI journal article supplement (doi:10.3390/nano5041588), 2015-09-29
Supplement: s1 [file s1]

## Supporting Information

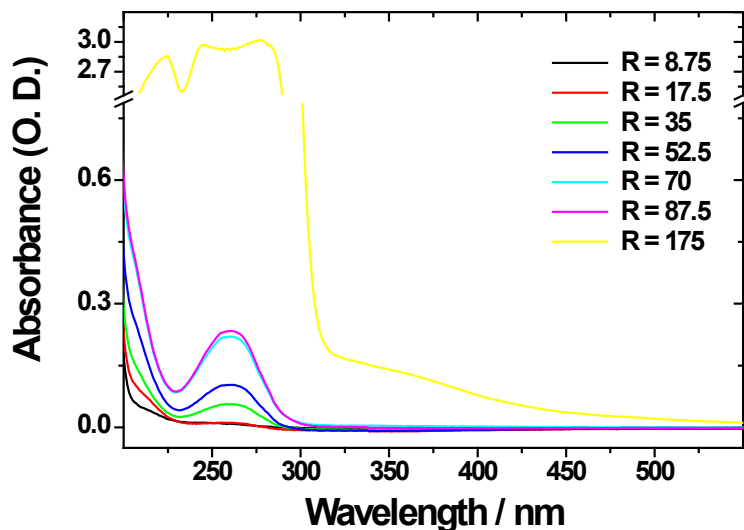

**Figure S1.** UV-visible spectra of the supernatants after complexation of Li28 with iron oxide nanoparticles for the different values of  $R$ .

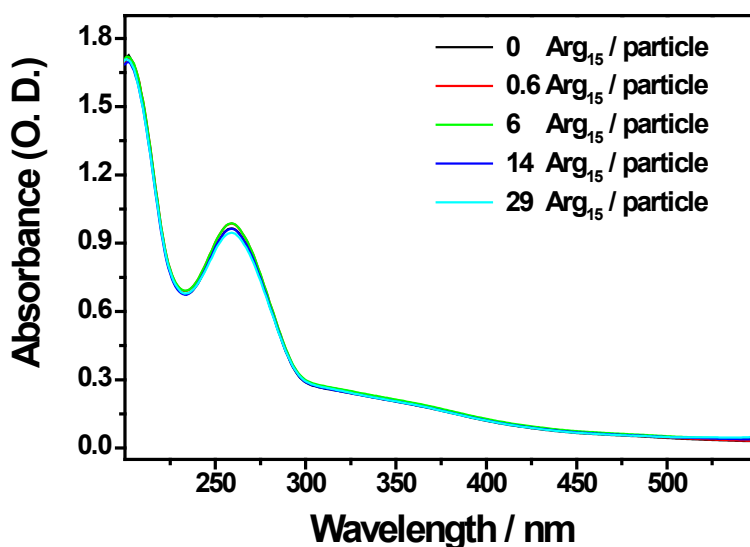

**Figure S2.** UV-visible spectra of the supernatants after complexation (“step by step”) of Li28 and Arg<sub>15</sub> with iron oxide nanoparticles for the different amounts of Arg<sub>15</sub>.

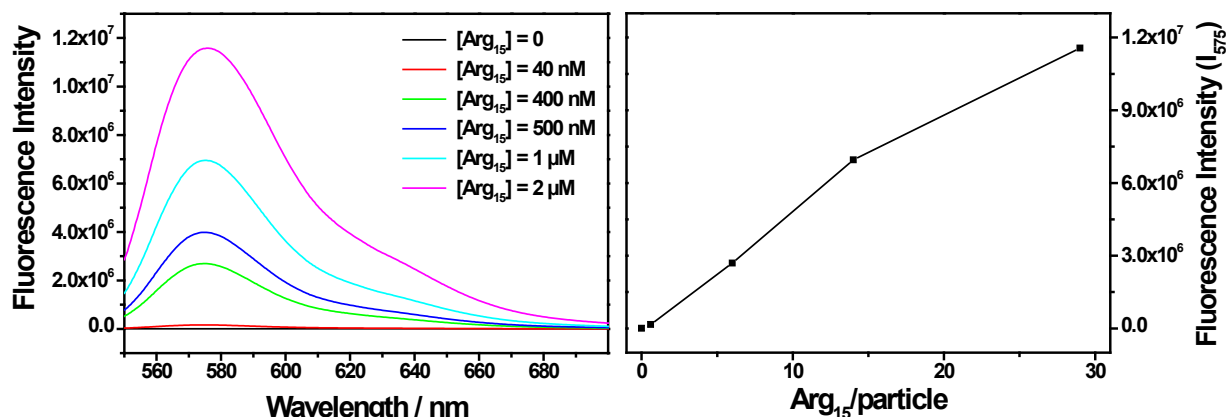

**Figure S3.** Fluorescence spectra of the TAMRA-labeled Arg<sub>15</sub> and calibration curve.

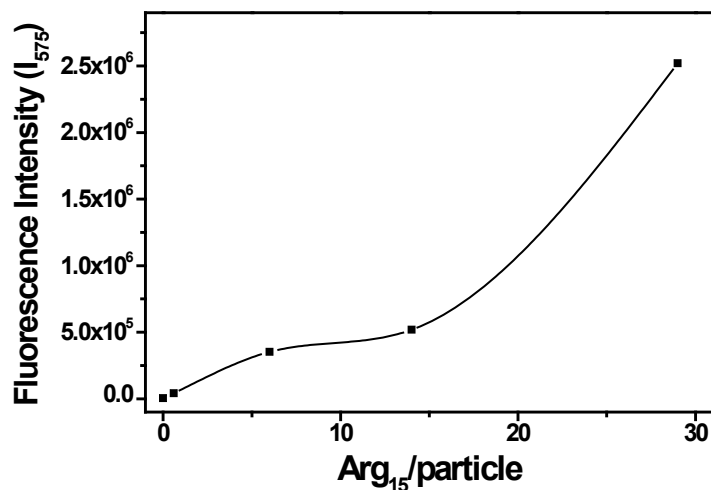

**Figure S4.** Fluorescence spectra of the supernatants after complexation (“step by step”) of Li28 and Arg<sub>15</sub> with iron oxide nanoparticles for the different amounts of Arg<sub>15</sub>.

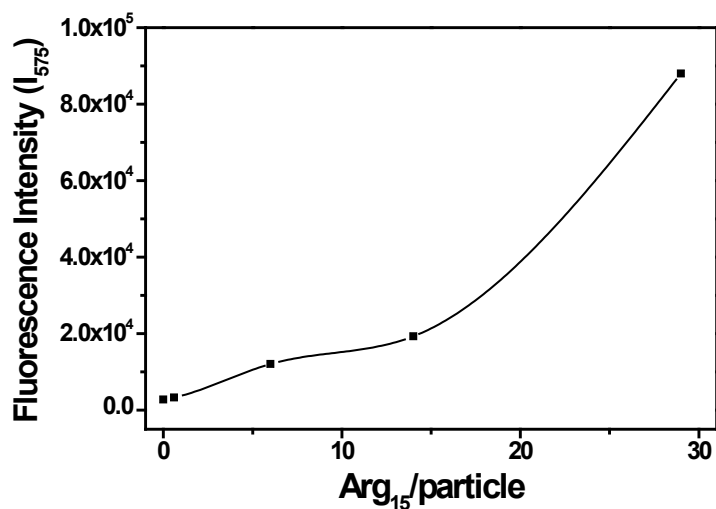

**Figure S5.** Fluorescence spectra of the complexes (complexation “step by step”) of Li28 and Arg<sub>15</sub> with iron oxide nanoparticles for the different amounts of Arg<sub>15</sub>.

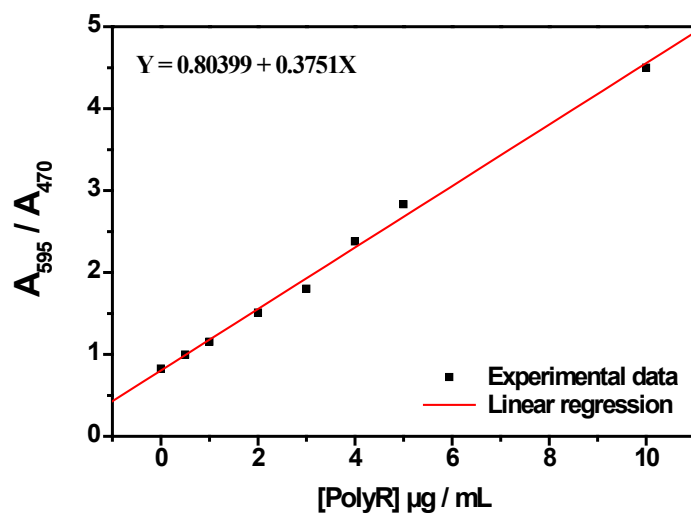

**Figure S6.** Calibration curve of the Bradford PolyR assay.

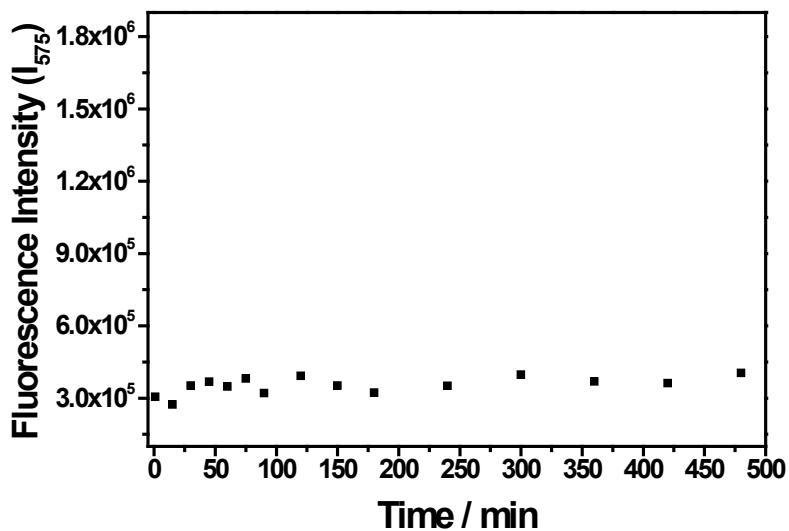

Figure S7. Fluorescence intensity of the nanocomplex in the presence of 10% serum.

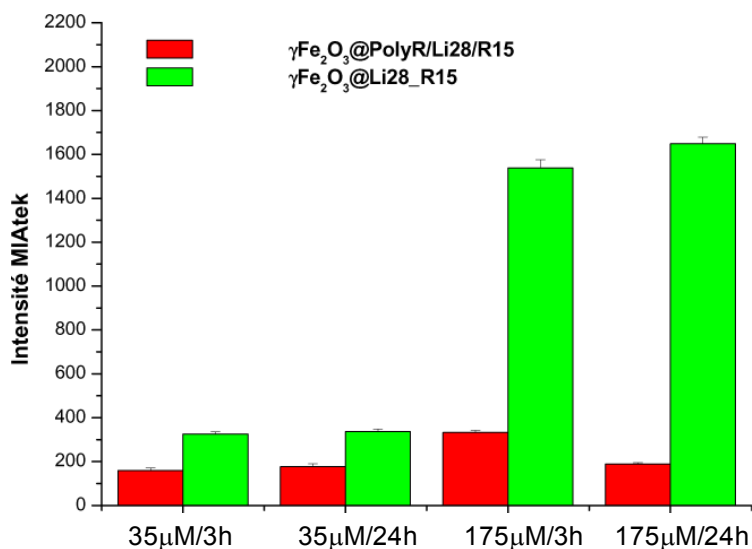

Figure S8. Intracellular internalisation of NPs was quantified with the MIAtek kit, 3 h after incubation with the NPs, and after a subsequent 24-h wash-out period.

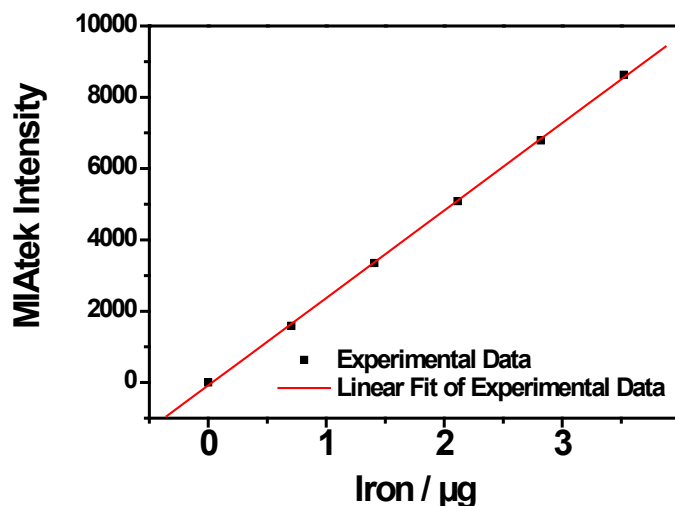

Figure S9. Calibration curve used for the MIAtek quantification.

**Table S1.** Percentage yield of complexation of Li28 with iron oxide nanoparticles for the different values of *R*.

| Values        | <i>R</i> |      |      |      |      |      |     |
|---------------|----------|------|------|------|------|------|-----|
|               | 8.75     | 17.5 | 35   | 52.5 | 70   | 87.5 | 175 |
| Yield %       | 98.3     | 98.9 | 98   | 98.1 | 95.9 | 96.7 | -   |
| Li28/particle | 8.6      | 17.3 | 34.3 | 51.2 | 67.1 | 84.6 | -   |

**Table S2.** Percentage yield of complexation of Arg<sub>15</sub> (complexation “step by step”).

| Values                      | (Arg <sub>15</sub> /Particle) |     |    |    |    |
|-----------------------------|-------------------------------|-----|----|----|----|
|                             | 0                             | 0.6 | 6  | 14 | 29 |
| Yield %                     | -                             | 74  | 87 | 92 | 78 |
| Arg <sub>15</sub> /particle | -                             | 0.4 | 5  | 13 | 23 |

© 2015 by the authors; licensee MDPI, Basel, Switzerland. This article is an open access article distributed under the terms and conditions of the Creative Commons Attribution license (<http://creativecommons.org/licenses/by/4.0/>).
